# Supplementary material for: Synthesis of β-ketoesters from renewable resources and Meldrum's acid
Source: Royal Society of Chemistry journal article supplement (doi:10.1039/c4ra08986c), 2014-01-01
Supplement: c4ra08986c1.pdf [file c4ra08986c1.pdf]

## Supplementary data

# Synthesis of $\beta$ -ketoesters from renewable resources and Meldrum's acid

Rafael C. Brinkerhoff<sup>a</sup>, Hernan F. Tarazona<sup>a</sup>, Patrick M. de Oliveira<sup>a</sup>,  
Darlene C. Flores<sup>a</sup>, Caroline Da R. Montes D'Oca<sup>b</sup>, Dennis Russowsky<sup>b</sup>,  
and Marcelo G. Montes D'Oca<sup>a\*</sup>

<sup>a</sup>Laboratório Kolbe de Síntese Orgânica, Escola de Química e Alimentos, Universidade Federal do Rio Grande, Rio Grande, RS, Brazil

<sup>b</sup>Laboratório de Síntese Orgânica, Instituto de Química, Universidade Federal do Rio Grande do Sul, Porto Alegre, RS, Brazil

## List of Contents

|                                                     |       |
|-----------------------------------------------------|-------|
| General Considerations.....                         | S2    |
| <sup>1</sup> H and <sup>13</sup> C NMR spectra..... | S3-S7 |

### ~~General Considerations~~ —

\* Corresponding author: Escola de Química e Alimentos, Universidade Federal do Rio Grande, Av. Itália, km 08, s/n. Carreiros. 96203-900. Rio Grande, RS, Brazil. Tel: +55 53 32336960; fax +55 53 3233 6961. E-mail address: [dqmdoca@furg.br](mailto:dqmdoca@furg.br) (MGM D'Oca)

**Chemistry.** All solvents and reagents were obtained from commercial suppliers (Synth, Brazil; and Sigma Aldrich, United States). Column chromatography was performed with Silica Gel 60 A (ACROS Organics 0.035–0.070 mesh). The reactions were monitored using thin-layer chromatography (TLC), performed with plates containing silica gel (Merck 60GF<sub>245</sub>), and the spots were visualized using iodo. Yields refer to chromatographically and spectroscopically homogeneous materials. Infrared spectra were measured using potassium bromide (KBr) pellets or sodium chloride (NaCl) disks on a Shimadzu-IR PRESTIGIE-21 spectrometer. The NMR spectra were recorded on a Varian VNMRS 300 MHz spectrometer (<sup>1</sup>H at 300 MHz and <sup>13</sup>C at 75.5 MHz, Universidade Federal do Rio Grande do Sul, UFRGS, Brazil) in deuteriochloroform (CDCl<sub>3</sub>) solution. The chemical shift data are reported in units of  $\delta$  (ppm) downfield from tetramethylsilane (TMS), which was used as an internal standard. Coupling constants (J) are reported in Hz and refer to apparent peak multiplicities.

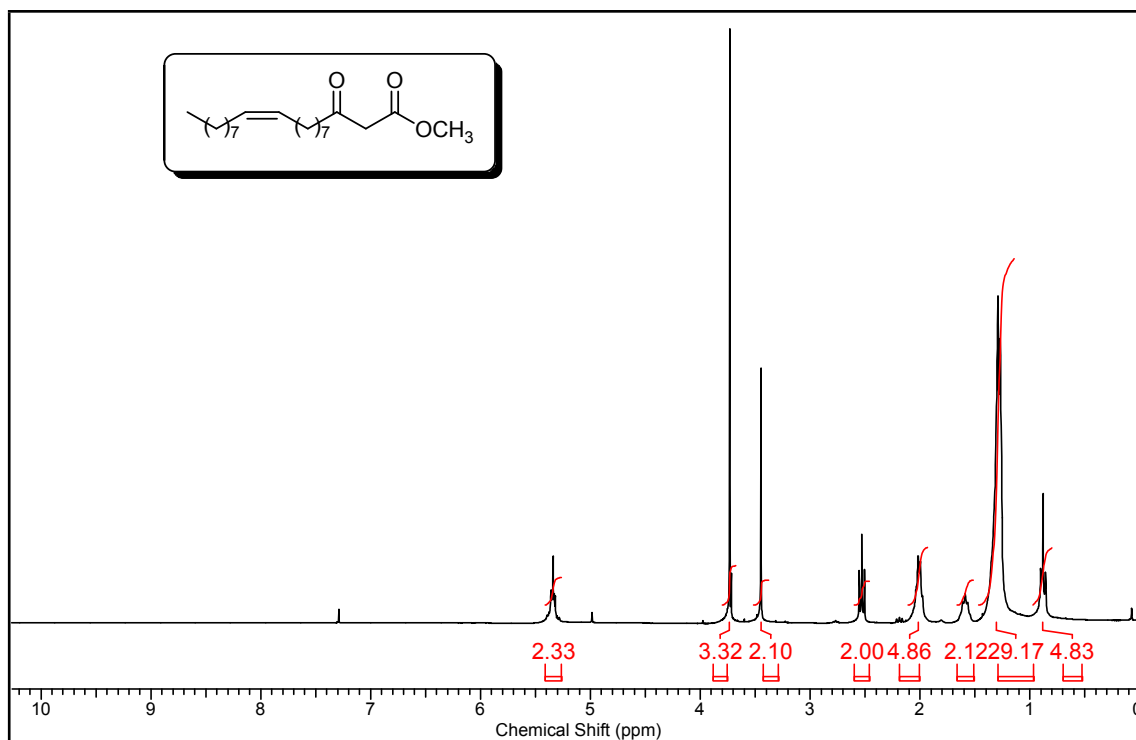

**Figure S1.** <sup>1</sup>H NMR spectrum (CDCl<sub>3</sub>, 300 MHz) of **4g**.

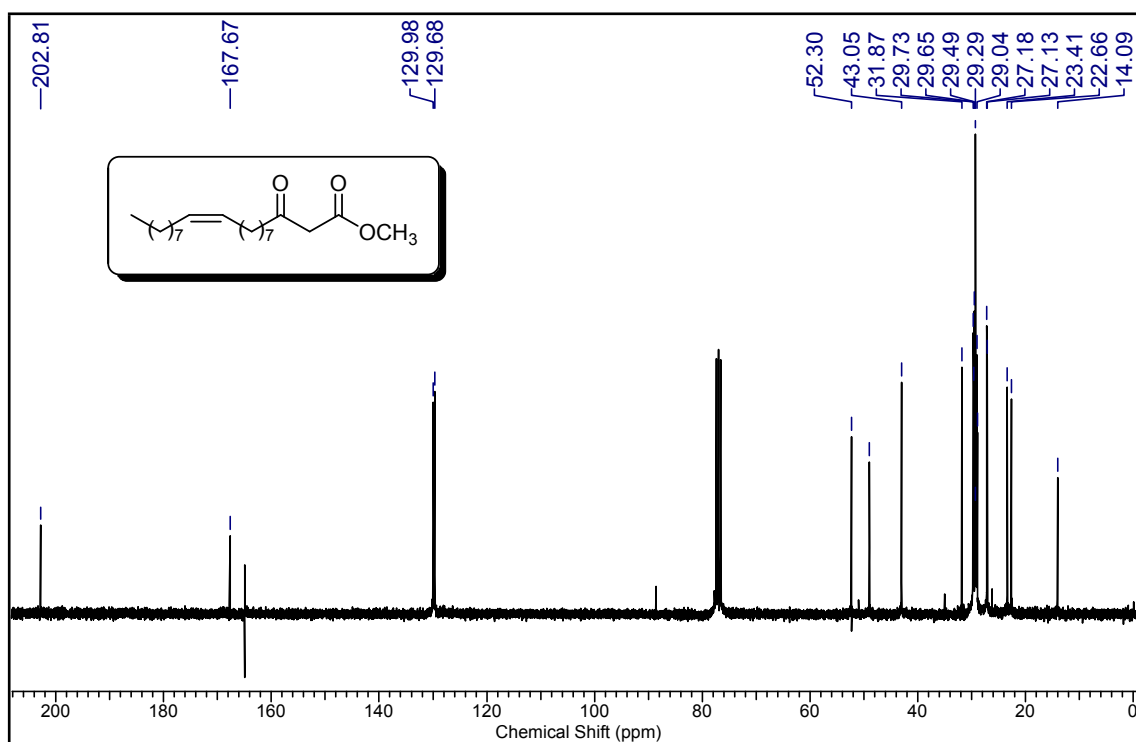

**Figure S2.** <sup>13</sup>C NMR spectrum (CDCl<sub>3</sub>, 75 MHz) of **4g**.

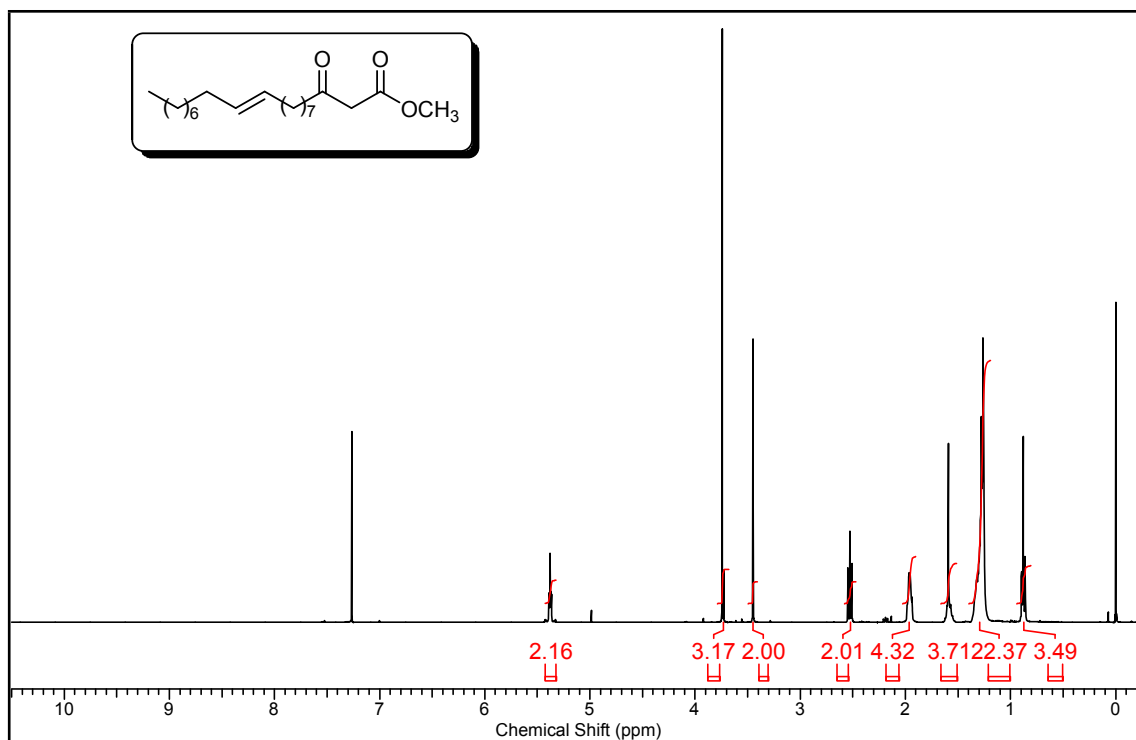

Figure S3. <sup>1</sup>H NMR spectrum (CDCl<sub>3</sub>, 300 MHz) of 4h.

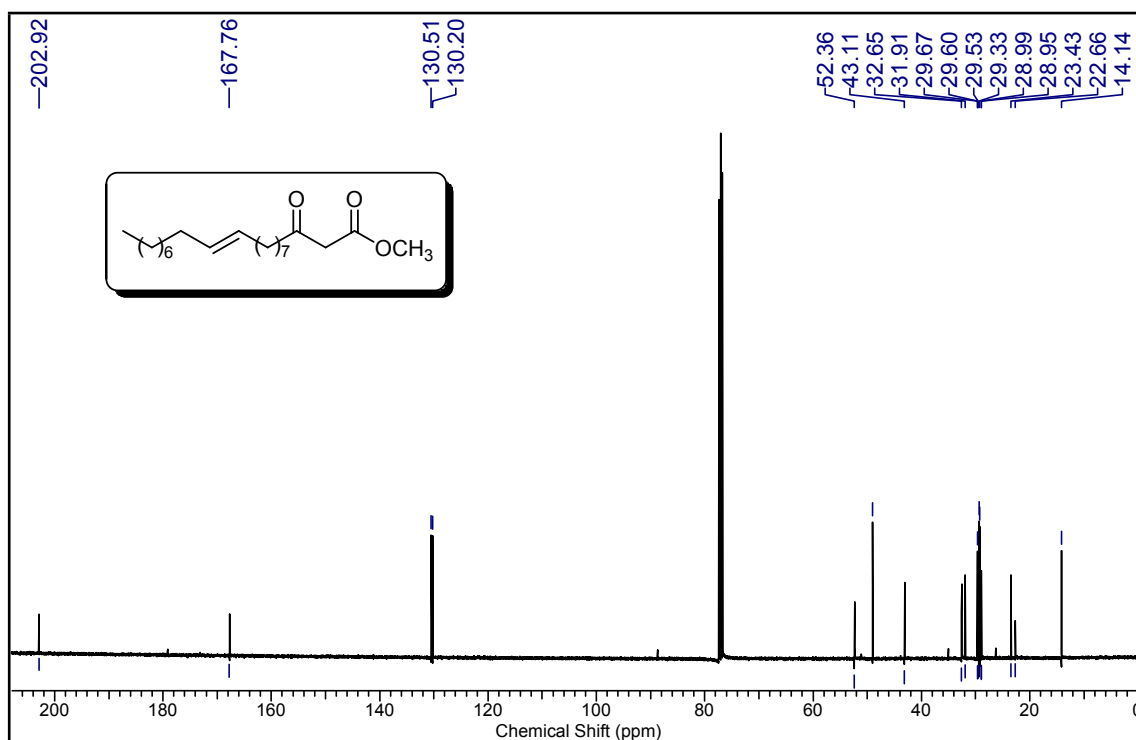

Figure S4. <sup>13</sup>C NMR spectrum (CDCl<sub>3</sub>, 75 MHz) of 4h.

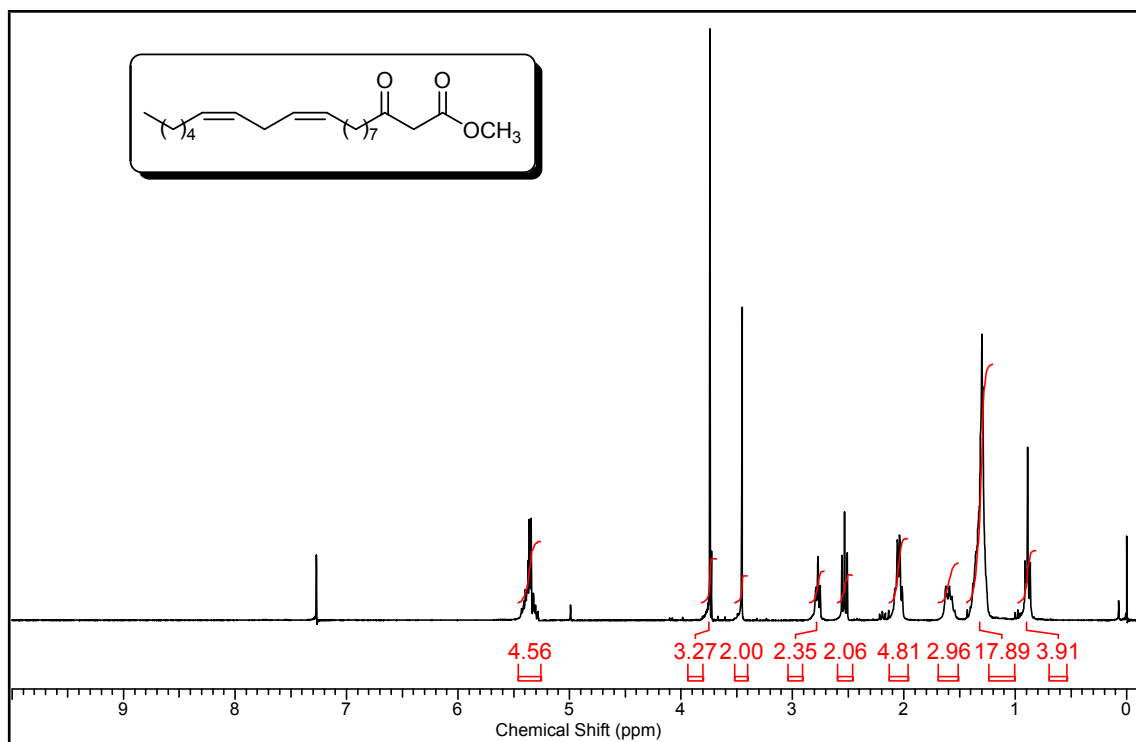

Figure S5. <sup>1</sup>H NMR spectrum (CDCl<sub>3</sub>, 300 MHz) of 4i.

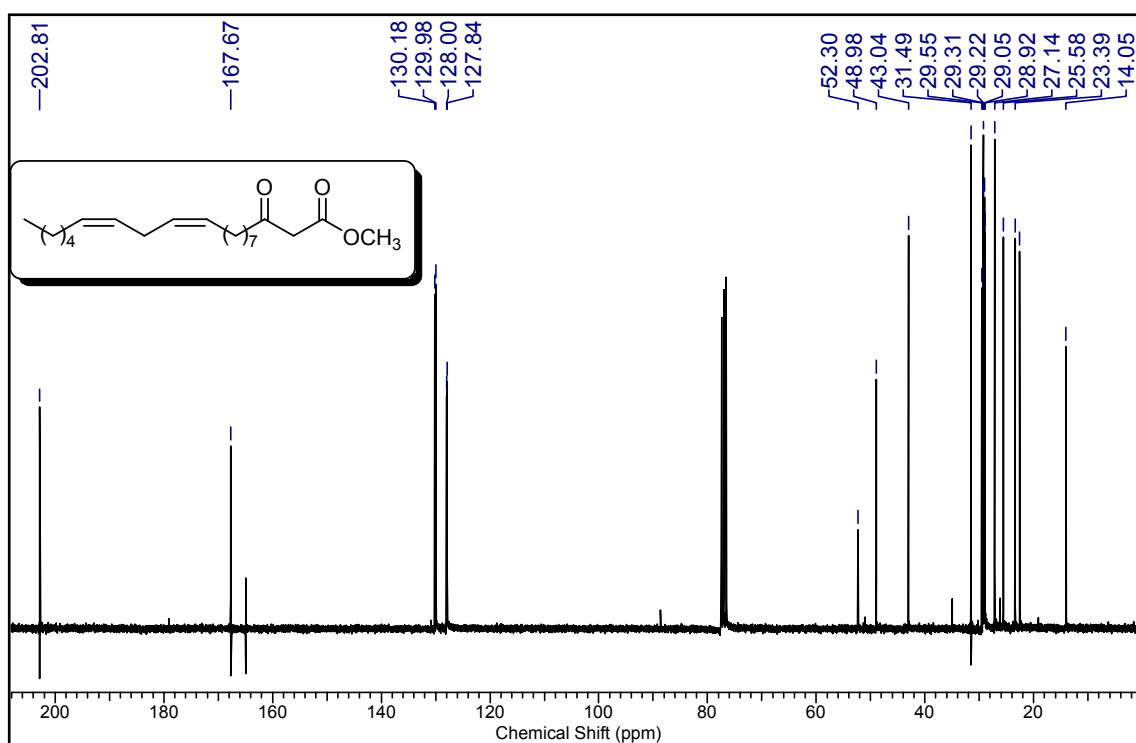

Figure S6. <sup>13</sup>C NMR spectrum (CDCl<sub>3</sub>, 75 MHz) of 4i.

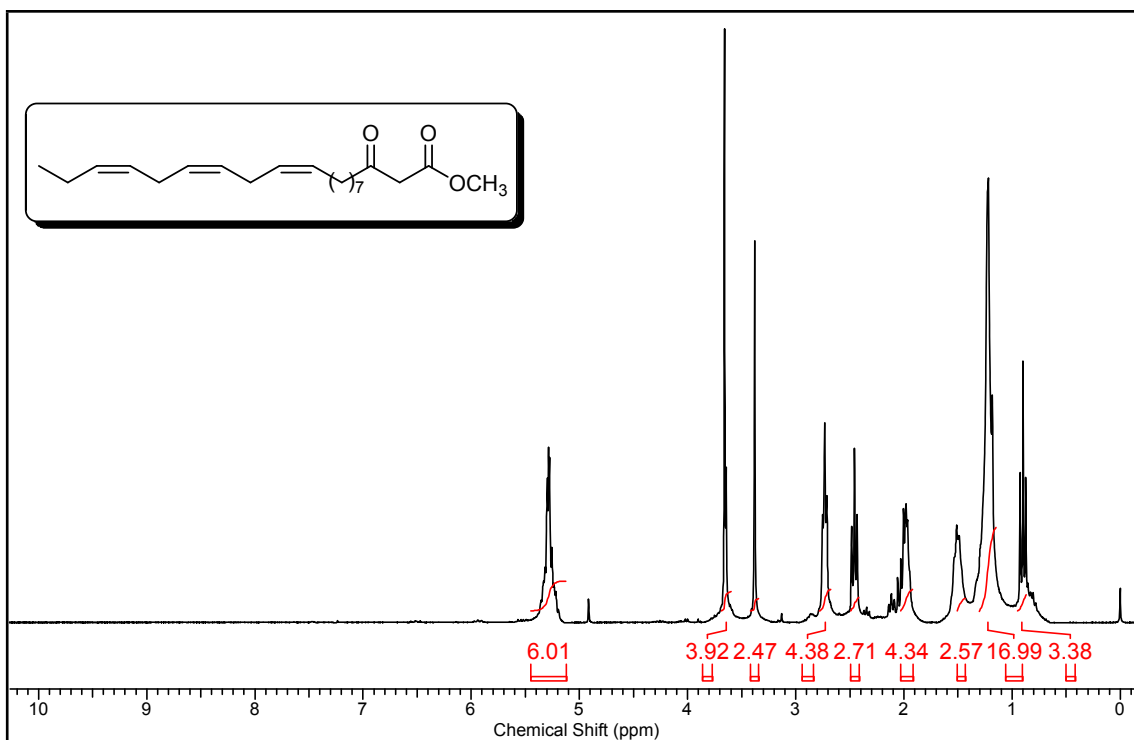

Figure S7. <sup>1</sup>H NMR spectrum (CDCl<sub>3</sub>, 300 MHz) of 4j.

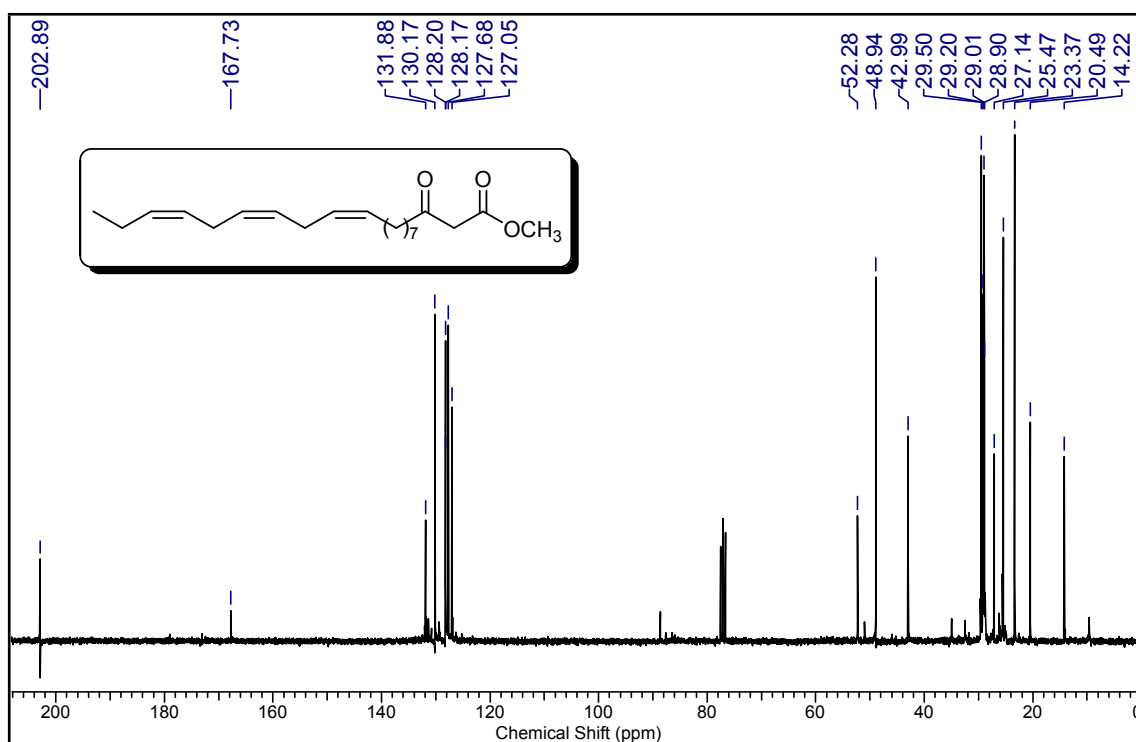

Figure S8. <sup>13</sup>C NMR spectrum (CDCl<sub>3</sub>, 75 MHz) of 4j.

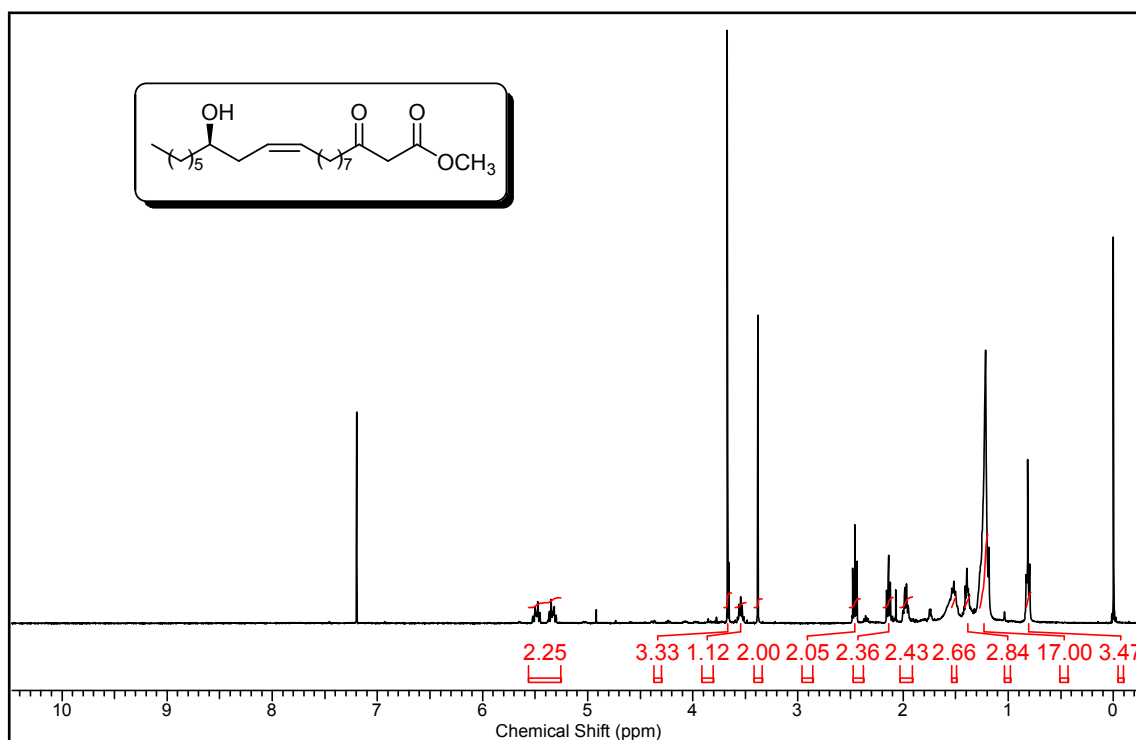

**Figure S9.** <sup>1</sup>H NMR spectrum (CDCl<sub>3</sub>, 300 MHz) of **4k**.

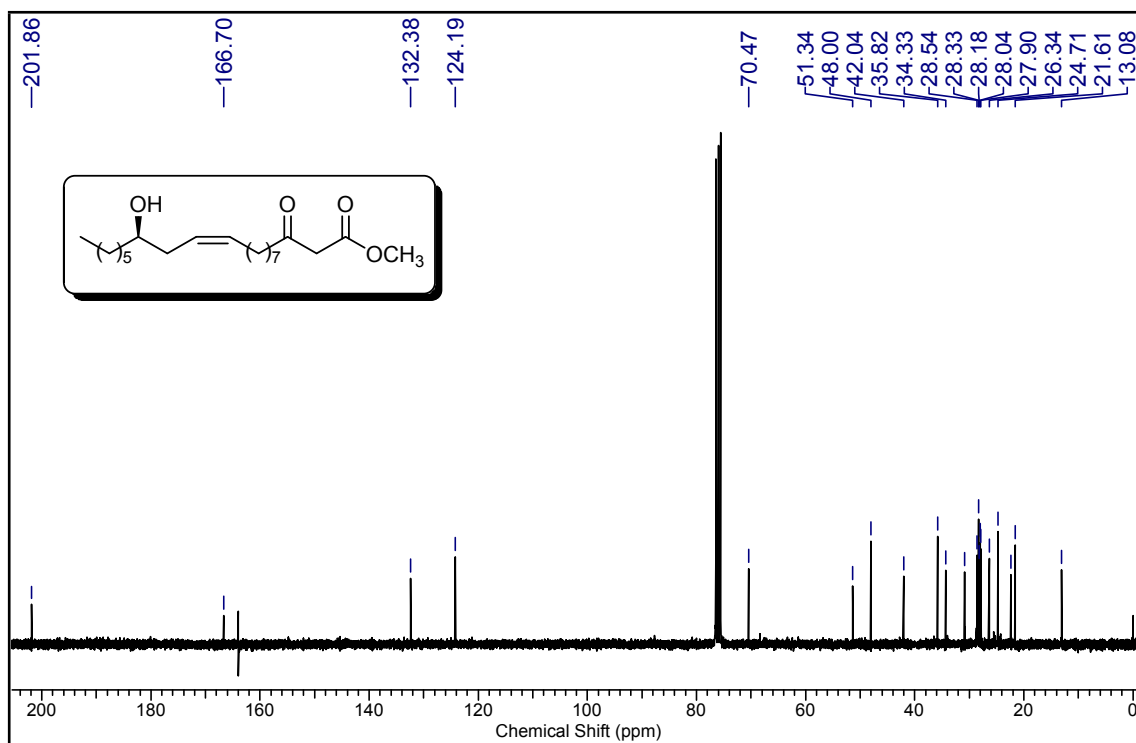

**Figure S10.** <sup>13</sup>C NMR spectrum (CDCl<sub>3</sub>, 75 MHz) of **4k**.
